# Supplementary material for: Inflammatory stimuli alter bone marrow composition and compromise bone health in the malnourished host
Source: PubMed Central journal article supplement (PMC9380851; doi:10.3389/fimmu.2022.846246), 2022-08-02
Supplement: DataSheet_1.pdf [file DataSheet_1.pdf]

Table S1. Anti-mouse antibodies to identify cell populations in the bone marrow by flow cytometry.

| target                              | clone     | Brand             |
|-------------------------------------|-----------|-------------------|
| <b>Monocytes</b>                    |           |                   |
| CD192 (CCR2)                        | SA203G11  | Biolegend         |
| CD11b                               | M1/70     | Biolegend         |
| Ly6C                                | HK1.4     | Biolegend         |
| <b>T cells inducing osteoclasts</b> |           |                   |
| CD3+                                | 145-2C11, | Biolegend         |
| CD254+ (RANKL+)                     | IK22/5    | eBioscience       |
| <b>Osteoclasts precursor</b>        |           |                   |
| CD11b <sup>low</sup>                | M1/70     | Biolegend         |
| CD45+                               | 30-F11    | BD Biosciences    |
| CD117+ (c-kit+)                     | ACK-2     | Biolegend         |
| CD115+ (CSFR-1R+)                   | AFS98     | eBioscience       |
| <b>Mesenchymal cells</b>            |           |                   |
| CD45-                               | 30-F11    | BD Biosciences    |
| CD29+                               | Ha2/5     | BD Biosciences    |
| CD105+ (Endoglin)                   | MJ7/18    | eBioscience       |
| <b>Vital makers</b>                 |           |                   |
| LIVE/DEAD Fixable Green stain       |           | ThermoFisher Sci. |
| Zombie UV                           |           | Biolegend         |
| Ghost Dye                           |           | Tonbo biosciences |
| <b>Cytokines</b>                    |           |                   |
| TNFA                                | MP6-XT22  | Biolegend         |
| IL1B                                | NJTEN3    | eBioscience       |
| IL6                                 | MP5-20F3  | eBioscience       |
